# Supplementary material for: MoS2 quantum dot-decorated MXene nanosheets as efficient hydrogen evolution electrocatalysts
Source: Royal Society of Chemistry journal article supplement (doi:10.1039/d1qi01528a), 2022-01-01
Supplement: d1qi01528a1.pdf [file d1qi01528a1.pdf]

## Electronic Supplementary Information

### MoS<sub>2</sub> quantum dot-decorated MXene nanosheets as efficient hydrogen evolution electrocatalysts

Huajie Huang,<sup>†</sup> Ya Xue,<sup>†</sup> Yongshuai Xie, Ying Yang, Lu Yang, Haiyan He, Quanguo

Jiang\*, Guobing Ying\*

College of Mechanics and Materials, Hohai University, Nanjing 210098, China

\*E-mails: jiangqg@hhu.edu.cn or yinggb2010@126.com

#### Supplementary Results

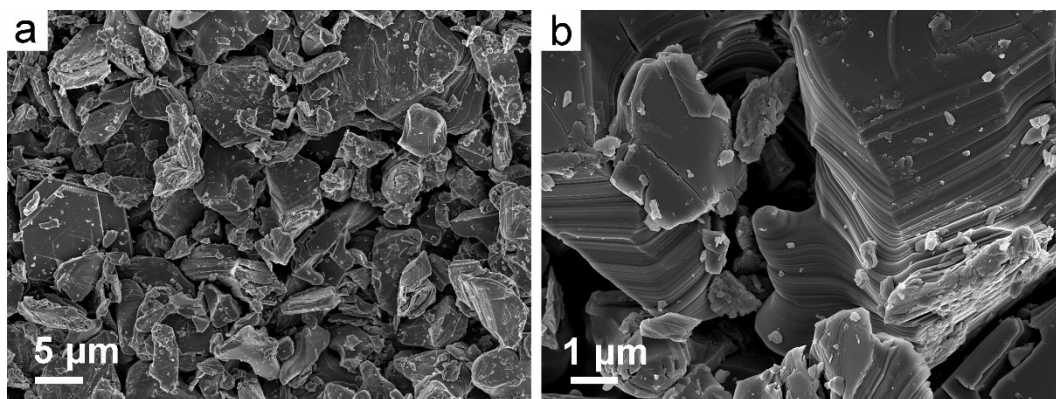

**Fig. S1** Representative SEM image of bulk Ti<sub>3</sub>AlC<sub>2</sub> at different magnifications.

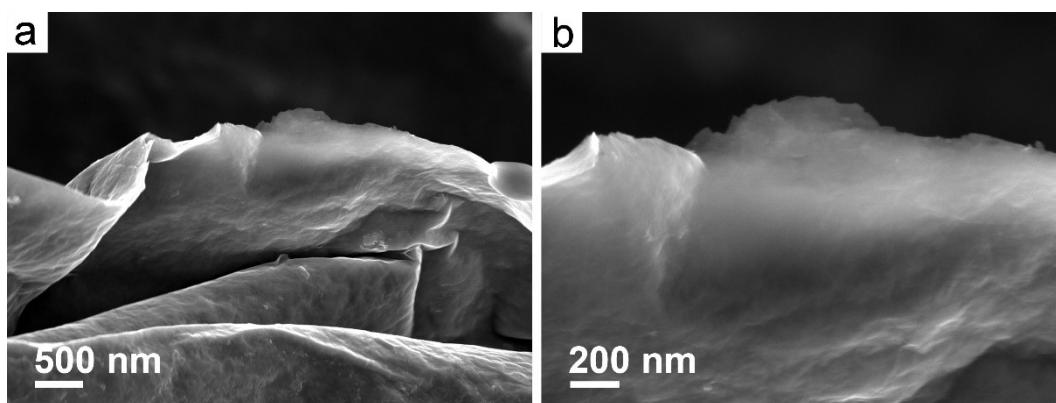

**Fig. S2** Representative SEM image of 2D exfoliated  $\text{Ti}_3\text{C}_2\text{T}_x$  at different magnifications.

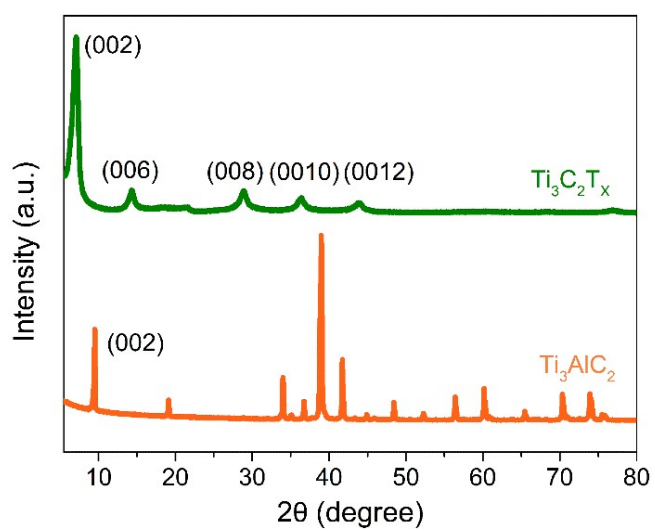

**Fig. S3** Typical XRD patterns of  $\text{Ti}_3\text{C}_2\text{T}_x$  nanosheets and  $\text{Ti}_3\text{AlC}_2$  powder.

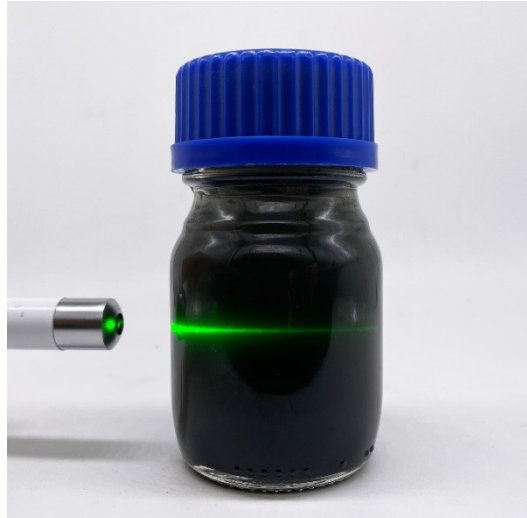

**Fig. S4** The Tyndall phenomenon of the as-obtained  $\text{Ti}_3\text{C}_2\text{T}_x$  MXene suspension.

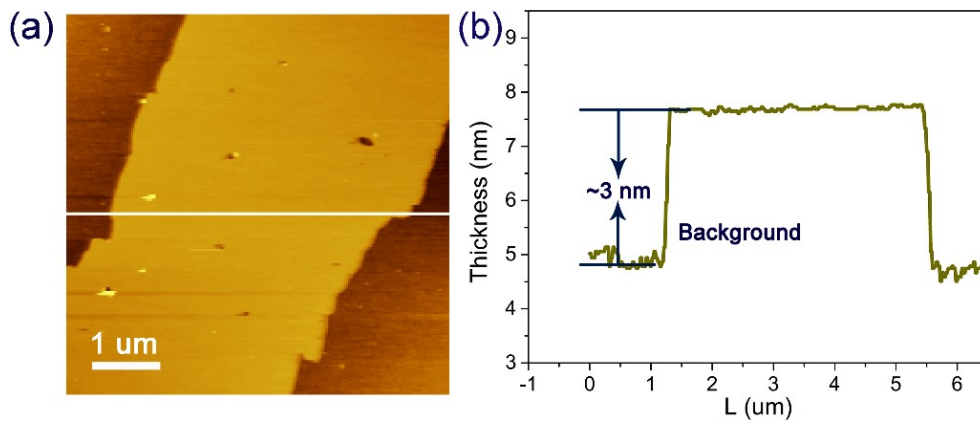

**Fig. S5** (a) Representative AFM image of the  $\text{Ti}_3\text{C}_2\text{T}_x$  MXene nanosheets. (b) The corresponding thickness analysis along the white lines displays that the uniform thickness of  $\text{Ti}_3\text{C}_2\text{T}_x$  nanosheets is about 3 nm.

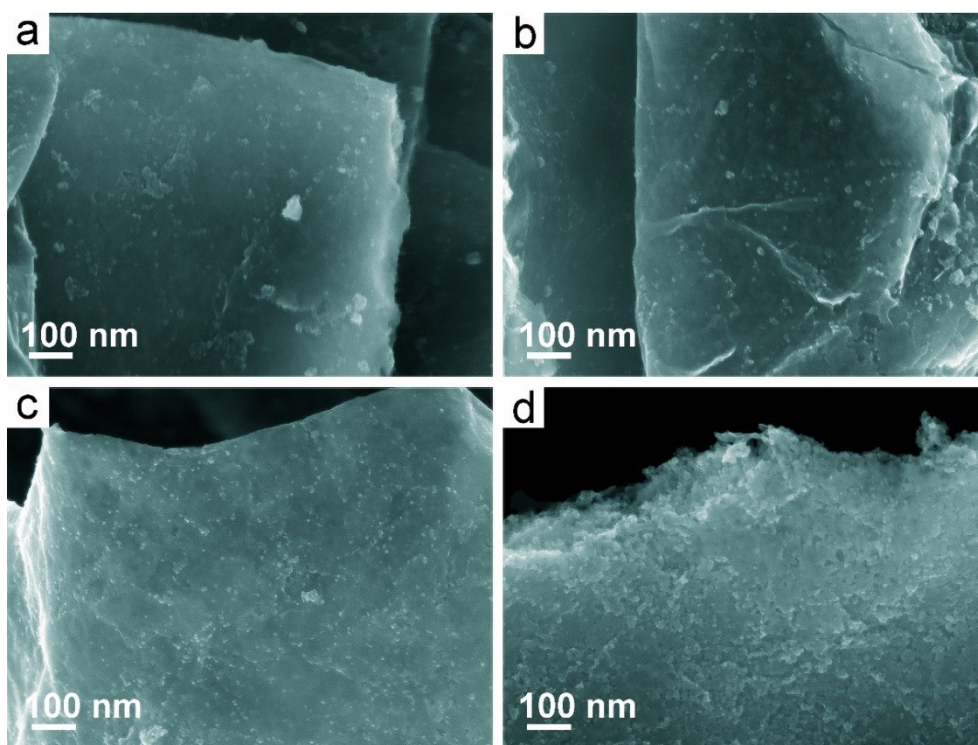

**Fig. S6** Representative FE-SEM images of four ratios of (a) MQDs(1%)/Ti<sub>3</sub>C<sub>2</sub>T<sub>x</sub>, (b) MQDs(3%)/Ti<sub>3</sub>C<sub>2</sub>T<sub>x</sub>, (c) MQDs(5%)/Ti<sub>3</sub>C<sub>2</sub>T<sub>x</sub>, and (d) MQDs(10%)/Ti<sub>3</sub>C<sub>2</sub>T<sub>x</sub> catalysts.

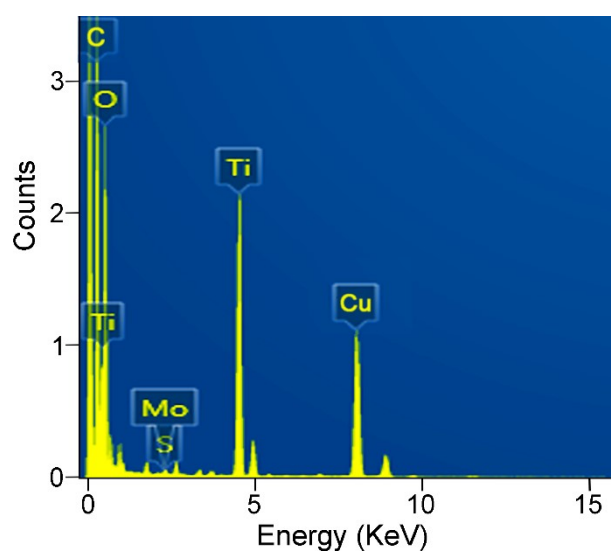

**Fig. S7** EDX spectrum of the 2D MQDs/Ti<sub>3</sub>C<sub>2</sub>T<sub>x</sub> nanoarchitecture on copper mesh discloses the presence of Ti, C, Mo and S components in the composite.

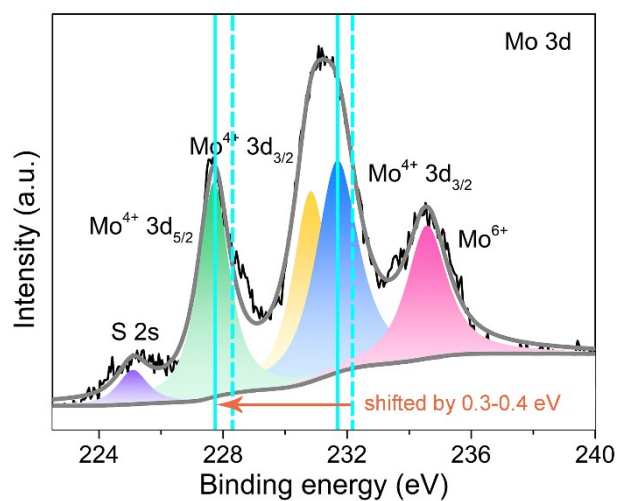

**Fig. S8** High-resolution Mo 3d spectrum of MQDs(5%)/Ti<sub>3</sub>C<sub>2</sub>T<sub>x</sub>, showing that the binding energies for Mo<sup>4+</sup> peaks of MQDs(5%)/Ti<sub>3</sub>C<sub>2</sub>T<sub>x</sub> are shifted negatively compared with those of pure MoS<sub>2</sub>.

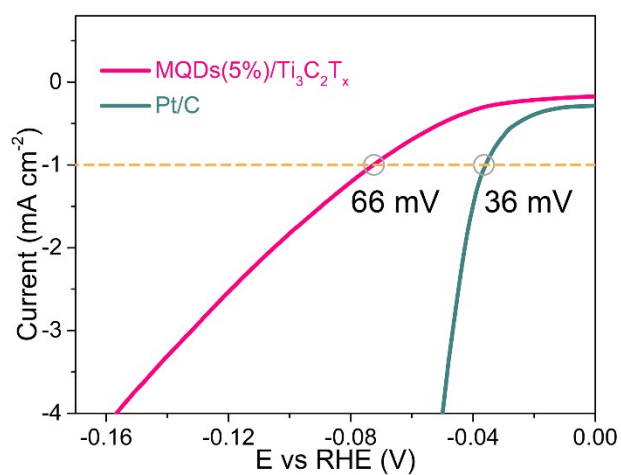

**Fig. S9** LSV curves of MQDs(5%)/Ti<sub>3</sub>C<sub>2</sub>T<sub>x</sub> and Pt/C electrodes in 0.5 M H<sub>2</sub>SO<sub>4</sub> solution.

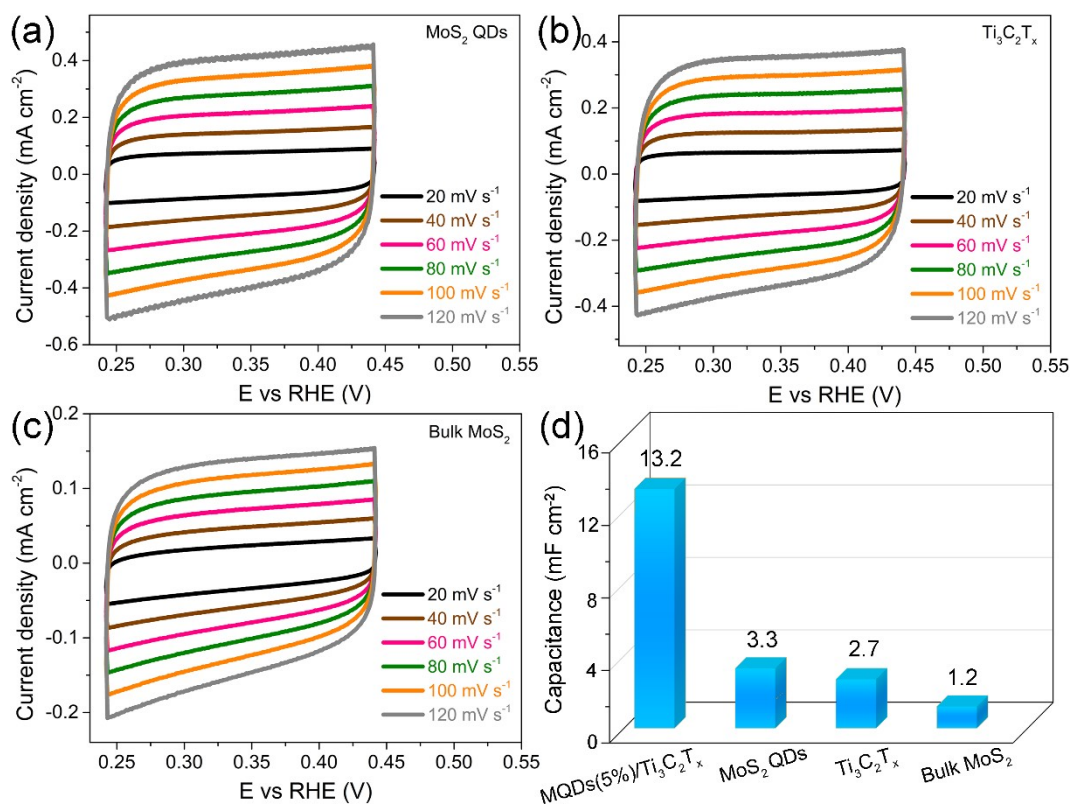

**Fig. S10** The CV curves for (a) MoS<sub>2</sub> QDs, (b) Ti<sub>3</sub>C<sub>2</sub>T<sub>x</sub> and (c) bulk MoS<sub>2</sub> at potential from 0.24 V to 0.44 V (vs. RHE) at scan rates from 20 to 120 mV s<sup>-1</sup>. (d) The specific C<sub>d1</sub> values of MQDs(5%)/Ti<sub>3</sub>C<sub>2</sub>T<sub>x</sub>, MoS<sub>2</sub> QDs, Ti<sub>3</sub>C<sub>2</sub>T<sub>x</sub> and bulk MoS<sub>2</sub>.

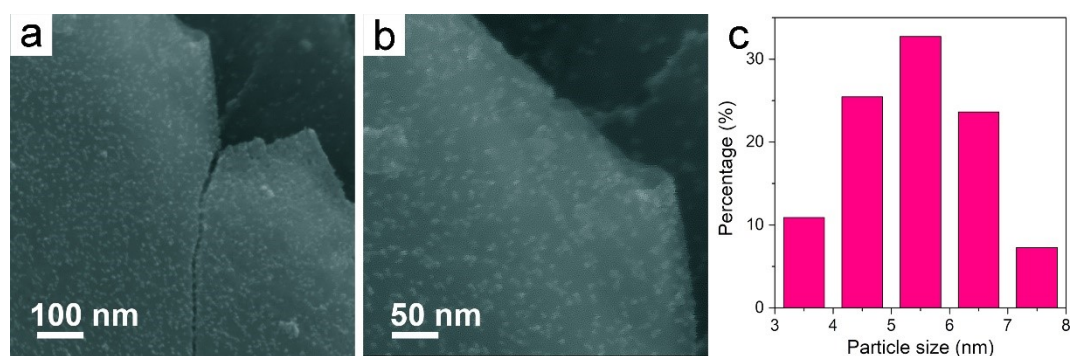

**Fig. S11** Representative (a, b) FE-SEM images and (c) corresponding particle distribution of the MQDs(5%)/Ti<sub>3</sub>C<sub>2</sub>T<sub>x</sub> catalyst after the cycling test.

**Table S1.** Comparison of HER properties for the 2D MQDs/Ti<sub>3</sub>C<sub>2</sub>T<sub>x</sub> catalysts with those of the state-of-the-art MoS<sub>2</sub>- and Ti<sub>3</sub>C<sub>2</sub>T<sub>x</sub>-based catalysts.

| Type of electrocatalyst                                          | Electrolyte                          | Onset potential (mV) | Tafel slope (mV dec <sup>-1</sup> ) | Ref.      |
|------------------------------------------------------------------|--------------------------------------|----------------------|-------------------------------------|-----------|
| MQDs(5%)/Ti <sub>3</sub> C <sub>2</sub> T <sub>x</sub>           | 0.5 M H <sub>2</sub> SO <sub>4</sub> | 66                   | 74                                  | This work |
| MoS <sub>2</sub> /C                                              | 0.5 M H <sub>2</sub> SO <sub>4</sub> | ~80                  | 78                                  | S1        |
| MoS <sub>2</sub> /CNTs                                           | 0.5 M H <sub>2</sub> SO <sub>4</sub> | ~130                 | 87                                  | S2        |
| MoSe <sub>2</sub> /Ti <sub>3</sub> C <sub>2</sub> T <sub>x</sub> | 0.5 M H <sub>2</sub> SO <sub>4</sub> | 61                   | 91                                  | S3        |
| RGO aerogel/Ti <sub>3</sub> C <sub>2</sub> T <sub>x</sub>        | 0.5 M H <sub>2</sub> SO <sub>4</sub> | ~70                  | 130                                 | S4        |
| MoS <sub>2</sub> /g-C <sub>3</sub> N <sub>4</sub> /RGO           | 0.5 M H <sub>2</sub> SO <sub>4</sub> | 170                  | 79                                  | S5        |
| Co <sub>4</sub> S <sub>3</sub> /N-doped C/MoS <sub>2</sub>       | 0.5 M H <sub>2</sub> SO <sub>4</sub> | ~120                 | 82                                  | S6        |
| Co <sub>9</sub> S <sub>8</sub> /MoS <sub>2</sub> /CNFs           | 0.5 M H <sub>2</sub> SO <sub>4</sub> | N.A.                 | 110                                 | S7        |
| Pt/Ti <sub>3</sub> C <sub>2</sub> T <sub>x</sub>                 | 0.5 M H <sub>2</sub> SO <sub>4</sub> | N.A.                 | 79                                  | S8        |
| Ti <sub>3</sub> C <sub>2</sub> T <sub>x</sub> nanofibers         | 0.5 M H <sub>2</sub> SO <sub>4</sub> | ~100                 | 97                                  | S9        |

## References

- S1 Q. Xu, Y. Liu, H. Jiang, Y. Hu, H. Liu and C. Li, Unsaturated sulfur edge engineering of strongly coupled MoS<sub>2</sub> nanosheet-carbon macroporous hybrid catalyst for enhanced hydrogen generation, *Adv. Energy Mater.*, 2019, **9**, 1802553.
- S2 Y. Dai, X. Wang, P. Wang, Y. Sun, R. Han and C. Luo, Enhanced hydrogen evolution for MoS<sub>2</sub>/CNTs induced by ethylene-glycol via charge transfer and proton concentration in acid solution, *Int. J. Hydrogen Energy*, 2021, **46**, 6419-6426.
- S3 J. Huang, X. Liu, F. Meng, L. He, J. Wang, J. Wu, X. Lu, Y. Tong and P. Fang, A facile

- method to produce MoSe<sub>2</sub>/MXene hybrid nanoflowers with enhanced electrocatalytic activity for hydrogen evolution, *J. Electroanal. Chem.*, 2020, **856**, 113727.
- S4 Y. Cheng, Y. Zhan, J. Ran, Z. Wang, S. Agnoli, H. Xia and G. Granozzi, Hybrid MXene/reduced graphene oxide aerogel microspheres for hydrogen evolution reaction, *Ionics*, 2021, **27**, 3099-3108.
- S5 M. Yan, Q. Jiang, L. Yang, H. He and H. Huang, Three-dimensional ternary hybrid architectures constructed from graphene, MoS<sub>2</sub>, and graphitic carbon nitride nanosheets as efficient electrocatalysts for hydrogen evolution, *ACS Appl. Energy Mater.*, 2020, **3**, 6880-6888.
- S6 C. Bao, X. Liu, M. Li, J. Meng, Y. Cai, X. Huang, T.-P. Loh and Z. Wang, MoS<sub>2</sub>-nanosheet-decorated C-N/Co<sub>4</sub>S<sub>3</sub> nanorod hybrid as a bifunctional electrocatalyst, *Electrochem. Commun.*, 2019, **106**, 106515.
- S7 H. Zhu, J. Zhang, R. Yanzhang, M. Du, Q. Wang, G. Gao, J. Wu, G. Wu, M. Zhang, B. Liu, J. Yao and X. Zhang, When cubic cobalt sulfide meets layered molybdenum disulfide: a core-shell system toward synergetic electrocatalytic water splitting, *Adv. Mater.*, 2015, **27**, 4752-4759.
- S8 B. Li, R. Ye, Q. Wang, X. Liu, P. Fang and J. Hu, Facile synthesis of coral-like Pt nanoparticles/MXene (Ti<sub>3</sub>C<sub>2</sub>T<sub>x</sub>) with efficient hydrogen evolution reaction activity, *Ionics*, 2021, **27**, 1221-1231.
- S9 W. Yuan, L. Cheng, Y. An, H. Wu, N. Yao, X. Fan and X. Guo, MXene nanofibers as highly active catalysts for hydrogen evolution reaction, *ACS Sustain. Chem. Eng.*, 2018, **6**, 8976-8982.
